# Supplementary material for: miR-1227 Targets SEC23A to Regulate the Shedding of Large Extracellular Vesicles
Source: MDPI journal article supplement (doi:10.3390/cancers13225850), 2021-11-22
Supplement: s1 [file s1]

A

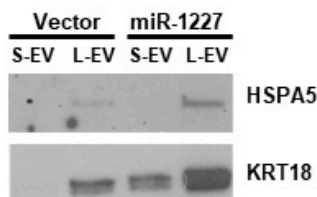

B

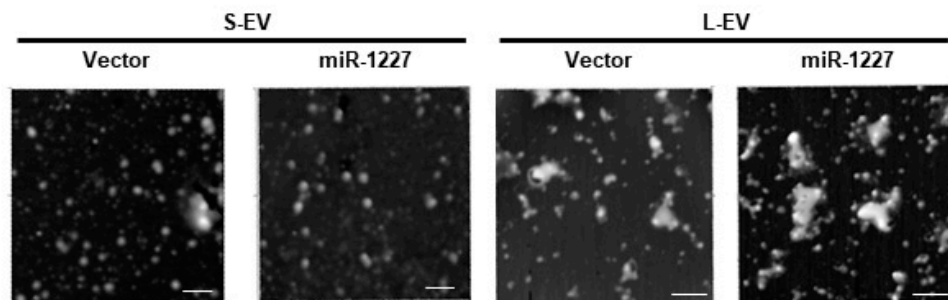

C

Input: SEC23A 3'UTR

&gt;NM\_006364.4 Homo sapiens Sec23 homolog A, coat complex II component (SEC23A), mRNA

TGAAGTGCTAATAATGTTAAAGACACTTAAGAAGATGAAATAATATTCAAATTTTCATTTTTCCCTTTTC  
 CATTATCTGTGGAAACCAACAGATATTGCTCTATATTTTTGTATTAGTATGGTTTGAGACAACATATG  
 GAAAAATGTTACATTGTAGATTAAGCTGGAATTATAATGAGAGCAATAAGAACAAATTTATTTTGCTTA  
 CCACAGTGTTATAGCTGGTTCTAGAAATTTGAAGTCTTTATAACTTAATTATGTTTAATAAAAAATAGAG  
 TCTGCCTCGTACTACAGATGTAACCTCATTTGTATATTGCAGACAGACCCAAAAGTGGCACTGAATTTTCTT  
 GCTCACCTTTTAAAACTTGTTCCCTTAATTTTAGCCAGAAAGCAAAAAACAATAGTAATGATAAATGTG  
 AACATTTTGTCTTATTCATTGAATATTTTCTGTAATTTTCAGCACTTATGTATACACTTTTCTGTACT  
 TACTAGGTTAAGGCAGATTTATTTTTATGATTGTTTAGGAATTATTTGATTTTATAATGGTAATTTTCA  
 TGATGATAATGTTTTGGTTATTTGGAAAGATAGTTTAGAGATGAAAGGTTTTTTGGGTAACAATCCCG  
 CAGCTGACAAAAATGTGAATTTCCACAAAAATCCAACTTATGTGACTAAACGCAGTAGTTTTTTTAA  
 AAGGGGAGATAGAAAATAAATGGTTTTGTGGAGTGCATTTTAGTAAGCCTTTGCAGTAAAATGACGGTT  
 GTAACACTAAACCAAATTTAGTTTTTACAGCATGGTTTTGTGTTTTCCCTTGTTTTTCAGAGGTAAA  
 TTTTGCAATTATCCTTCAGTATTTTAACTATTTTGGCAGTTTACACATTACTTTTTGTTTTTCCCTTC  
 CTTTTGTGAAATGTATTAAGTTGTGGTTCTTATTGAAACAGTATTATATAATGTTTGCTTAATTATATC  
 ATGTGATGCTCAGTTCTATTTGATTATTCATTAGTATTCACTTTTACCTTTAAAGTTTACTTGTAGCA  
 AATATGTTTACATTGATAAAGCCAGATATGTTTTGACAATGAAATTTACATATCAAGTACTGCAATAAAA  
 AGGTGGTGCTATGATATATGCTTAGGAGGACAGTTTTAATGATTGTACTTGCATGAACACAATCATATGA  
 TGGTAAAGCAGAACTTAAGAAAAAATGTTTATGTGTTATATTCAATTAGCTTAAATAAGTTGCTTTGT  
 TATATTTATTTGAATTGAACCTACGCTAGGCCTAAATGCCAATAAAATATACTTTTCACTGTT

miR-1227 binding site A

miR-1227 binding site B
